# Supplementary material for: The Effect of Zinc, Selenium, and Their Combined Supplementation on Androgen Receptor Protein Expression in the Prostate Lobes and Serum Steroid Hormone Concentrations of Wistar Rats
Source: PubMed Central journal article supplement (PMC7019230; doi:10.3390/nu12010153), 2020-01-06
Supplement: nutrients-12-00153-s001.pdf [file nutrients-12-00153-s001.pdf]

**Supplementary Table S1.** Blood Zn and Se concentrations (mean  $\pm$  SD) after 30 and 90-day administration of Zn and/or Se, and after 90 days exposure with an additional 90-day post-administration period.

|                                                                             |         | Zn<br>[ $\mu\text{g/mL}$ ] | Se<br>[ $\mu\text{g/mL}$ ]       |
|-----------------------------------------------------------------------------|---------|----------------------------|----------------------------------|
| 30 days of<br>administration                                                | Control | 5.59 $\pm$ 0.16            | 0.50 $\pm$ 0.04                  |
|                                                                             | Zn      | 5.87 $\pm$ 0.24            | 0.51 $\pm$ 0.03                  |
|                                                                             | Se      | 5.69 $\pm$ 0.24            | 0.55 $\pm$ 0.03                  |
|                                                                             | Zn+Se   | 5.72 $\pm$ 0.26            | 0.52 $\pm$ 0.02                  |
| 90 days of<br>administration                                                | Control | 5.41 $\pm$ 0.21            | 0.49 $\pm$ 0.02                  |
|                                                                             | Zn      | 5.81 $\pm$ 0.21            | 0.50 $\pm$ 0.02                  |
|                                                                             | Se      | 5.72 $\pm$ 0.28            | <b>0.57<math>\pm</math>0.03*</b> |
|                                                                             | Zn+Se   | 5.76 $\pm$ 0.29            | 0.53 $\pm$ 0.03                  |
| 90 days of<br>administration<br>and 90-day post<br>administration<br>period | Control | 5.19 $\pm$ 0.33            | 0.50 $\pm$ 0.02                  |
|                                                                             | Zn      | 5.79 $\pm$ 0.32            | 0.51 $\pm$ 0.02                  |
|                                                                             | Se      | 5.61 $\pm$ 0.32            | 0.56 $\pm$ 0.03                  |
|                                                                             | Zn+Se   | 5.80 $\pm$ 0.39            | 0.54 $\pm$ 0.03                  |

\* result statistically significant in comparison to control group,  $p \leq 0.05$
